# Supplementary material for: Effects of pharmacological modulators of α-synuclein and tau aggregation and internalization
Source: Springer Nature journal article supplement (doi:10.1038/s41598-020-69744-y), 2020-07-30
Supplement: MOESM1 [file 41598_2020_69744_MOESM1_ESM.pdf]

## **Effects of pharmacological modulators of $\alpha$ -synuclein and tau aggregation and internalization**

Antonio Dominguez-Meijide<sup>1,2</sup>, Eftychia Vasili<sup>1</sup>, Annekatrin König<sup>1</sup>, Maria-Sol Cima-Omori<sup>3</sup>, Alain Ibáñez de Opakua<sup>3</sup>, Andrei Leonov<sup>4</sup>, Sergey Ryazanov<sup>4</sup>, Markus Zweckstetter<sup>3,4,5</sup>, Christian Griesinger<sup>4</sup>, and Tiago F. Outeiro<sup>1,6,7,\*</sup>

<sup>1</sup>Department of Experimental Neurodegeneration, Center for Biostructural Imaging of Neurodegeneration, University Medical Center Goettingen, Goettingen, Germany

<sup>2</sup>Laboratory of Neuroanatomy and Experimental Neurology, Dept. of Morphological Sciences, CIMUS, University of Santiago de Compostela, Santiago de Compostela, Spain; Networking Research Center on Neurodegenerative Diseases (CIBERNED), Spain

<sup>3</sup>German Center for Neurodegenerative Diseases (DZNE), Von-Siebold-Str. 3a, 37075 Göttingen, Germany.

<sup>4</sup>Department for NMR-based Structural Biology, Max Planck Institute for Biophysical Chemistry, Am Faßberg 11, 37077 Göttingen, Germany.

<sup>5</sup>Department of Neurology, University Medical Center Göttingen, University of Göttingen, Waldweg 33, 37073 Göttingen, Germany.

<sup>6</sup>Max Planck Institute for Experimental Medicine, Goettingen, Germany

<sup>7</sup>Translational and Clinical Research Institute, Faculty of Medical Sciences, Newcastle University, Framlington Place, Newcastle Upon Tyne, NE2 4HH, UK

### **\*Correspondence to:**

Prof. Dr. Tiago F. Outeiro

Department of Experimental Neurodegeneration

University Medical Center Goettingen

37073 Goettingen

Germany

Telephone: +495513913545

Email: tiago.outeiro@med.uni-goettingen.de

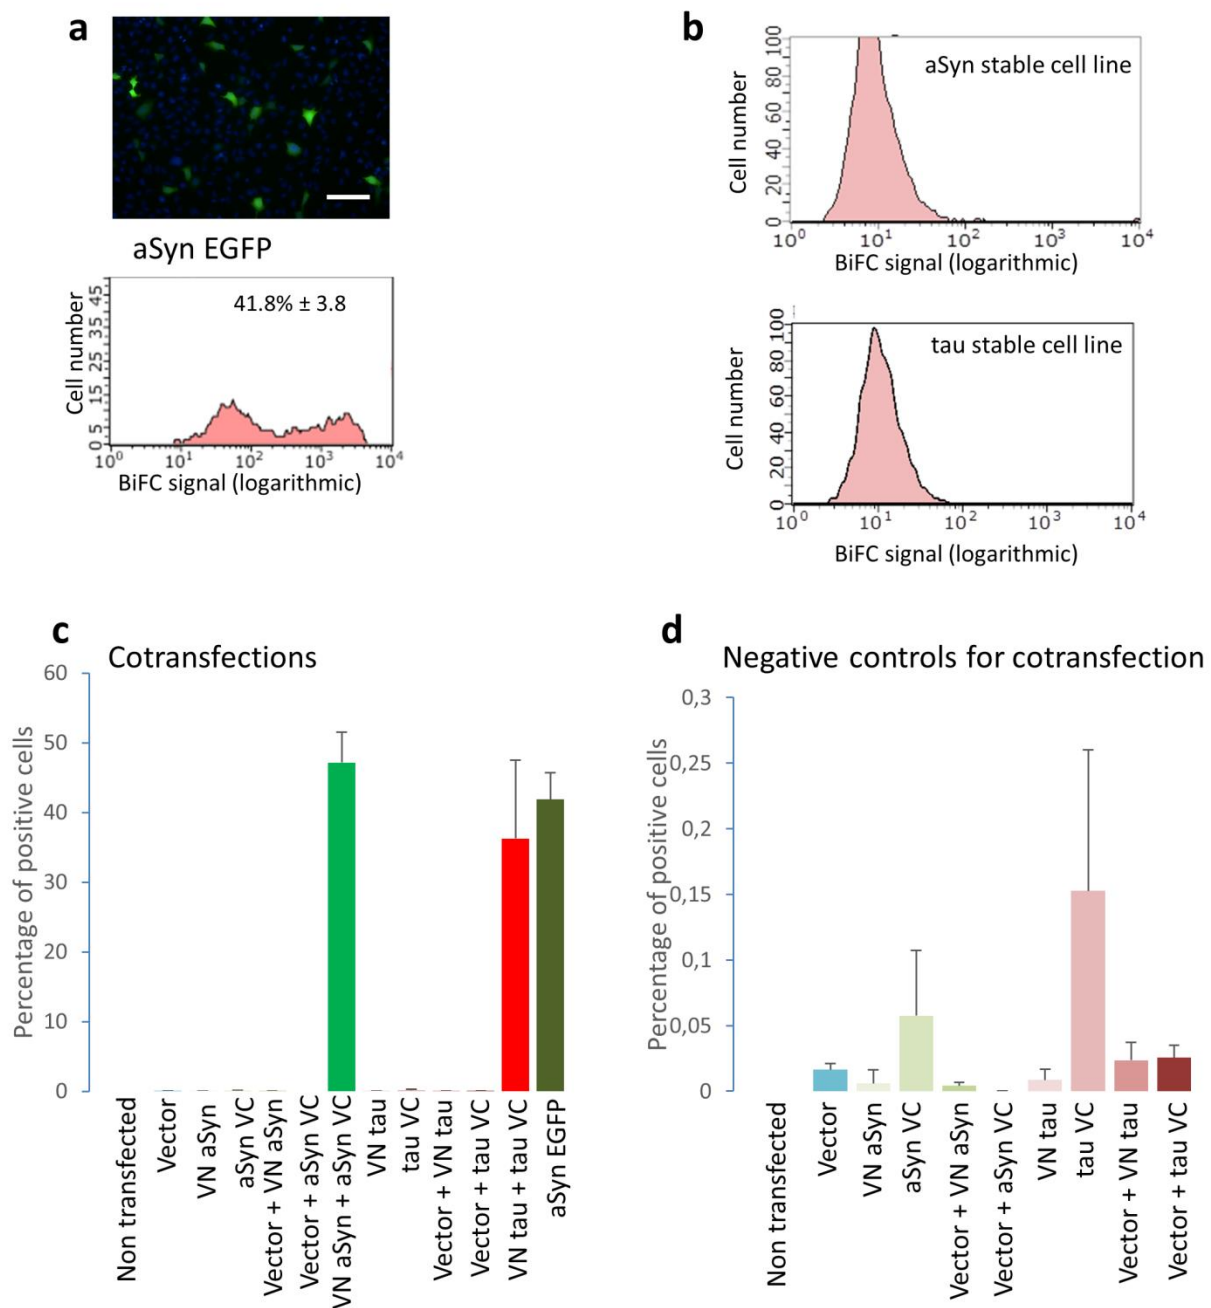

Supplementary Fig. S1. Both halves of venus are needed for the reconstitution of

**the fluorophore. a.** Representative pictures and histogram of the flow cytometry for aSyn EGFP showing similar results to the ones obtained in cotransfection. Cells with a value of fluorescence intensity above 120 random fluorescence units are considered positive. Scale bar 200  $\mu\text{m}$ . **b** Histograms of the flow cytometry for the stable cell lines show no positive cells. Cells with a value of fluorescence intensity above 120 random fluorescence units are considered positive. **c.** Co-transfection combinations show percentages of positive cells above 30% **d.** Negative controls show less than 0.2% positive cells. Error bars represent SD.

**a**

Cell lysates sarkosyl extraction

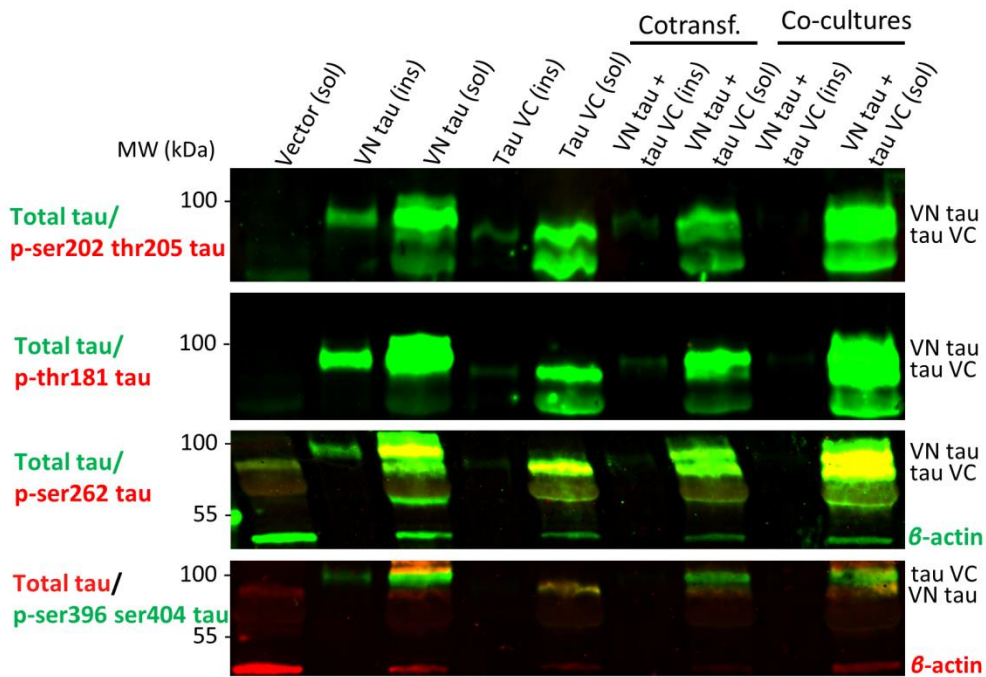

**b**

Media sarkosyl extraction

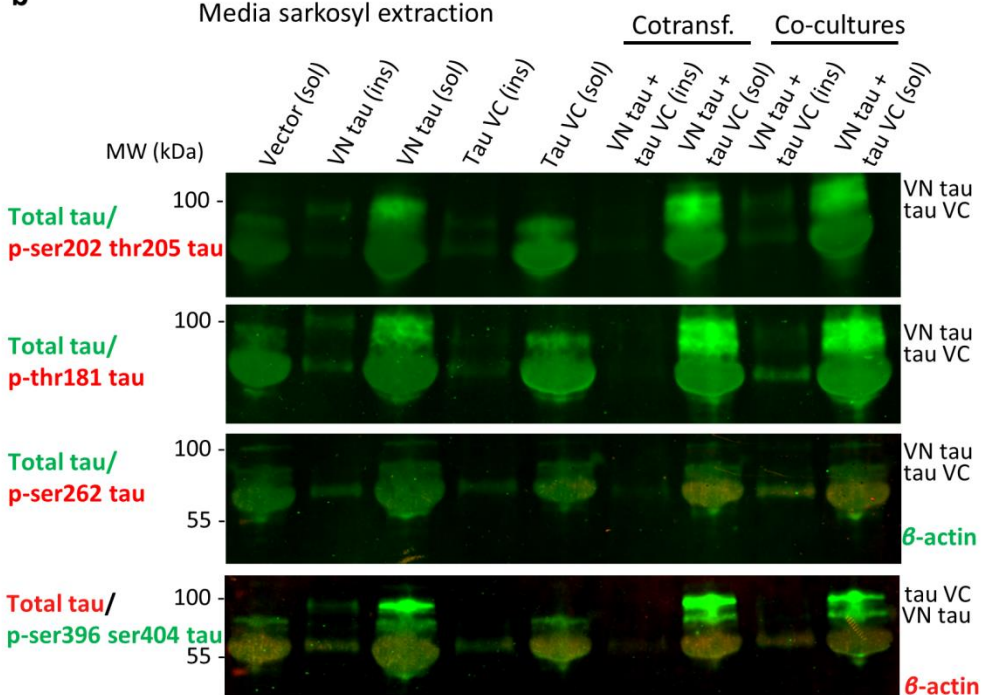

**Supplementary Fig. S2. Tau is secreted in sarkosyl soluble and insoluble fractions.**

**a.** Western blot showing different tau BiFC fragments in cotransfected cells and co-cultured cells in sarkosyl soluble (sol) and insoluble fractions (ins) and phosphorylation of

serine 262, serine 396 and serine 404. Full length blots are presented in Supplementary Fig. S6F-I. **b.** Western blot showing different tau BiFC fragments, alone, cotransfected and in co-culture, present in cell media in the sarkosyl soluble and insoluble fractions. Full length blots are presented in Supplementary Fig. S6j-m.

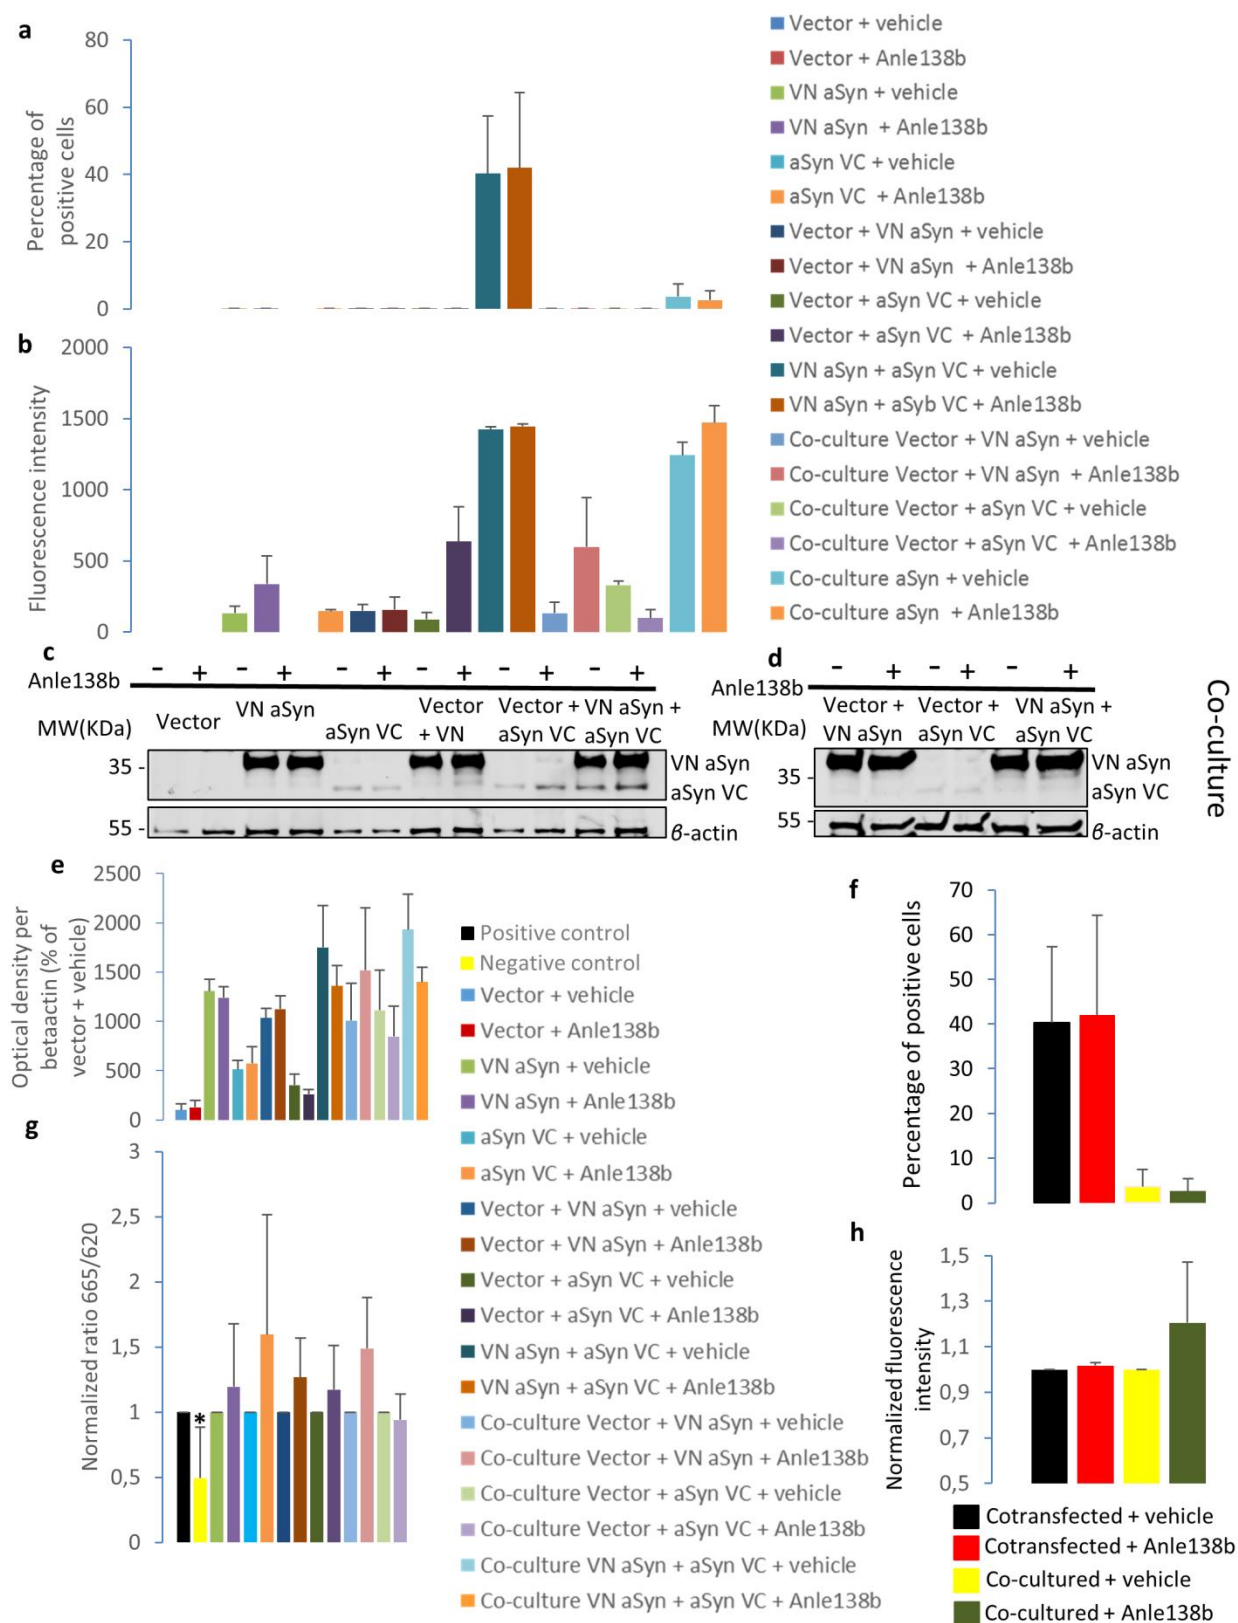

**Supplementary Fig. S3. Treatment with anle138b inhibits aSyn aggregation without altering protein expression.** **a.** Flow cytometry results show that treatment with anle138b does not lead to a significant decrease in the percentage of positive cells. **b.** Flow

cytometry results showing fluorescence intensity levels obtained in cells treated with vehicle and anle138b. **c.** Western blots of transfected and non-co-cultured cells treated and non-treated with anle138b. Full length blots are presented in Supplementary Fig. S6n. **d.** Western blots of transfected and co-cultured cells treated with anle138b. Full length blots are presented in Supplementary Fig. S6o. **e.** Western blot results of normalized optical density per beta-actin obtained in cells treated with vehicle and Anle138b showing that treatment with Anle138b does not lead to significant changes in protein expression (N=4). **f.** Flow cytometry results showing the percentage of positive cells in co-transfected cells and in co-cultured cells. **g.** HTRF results for the normalized ratio 665/620 in cells treated with vehicle and anle138b. Treatment with anle138b does not lead to a significant decrease in protein aggregation levels 12 hours after administration in comparison with cells treated with vehicle. Positive control shows a significantly higher value than the negative control. (N=4) **h.** Flow cytometry results for the normalized fluorescence intensity show no statistically significant differences (N=3). \*  $p < 0.05$  in comparison with the control. \$  $p < 0.05$  in comparison with monomeric aSyn + vehicle. Error bars represent SD.

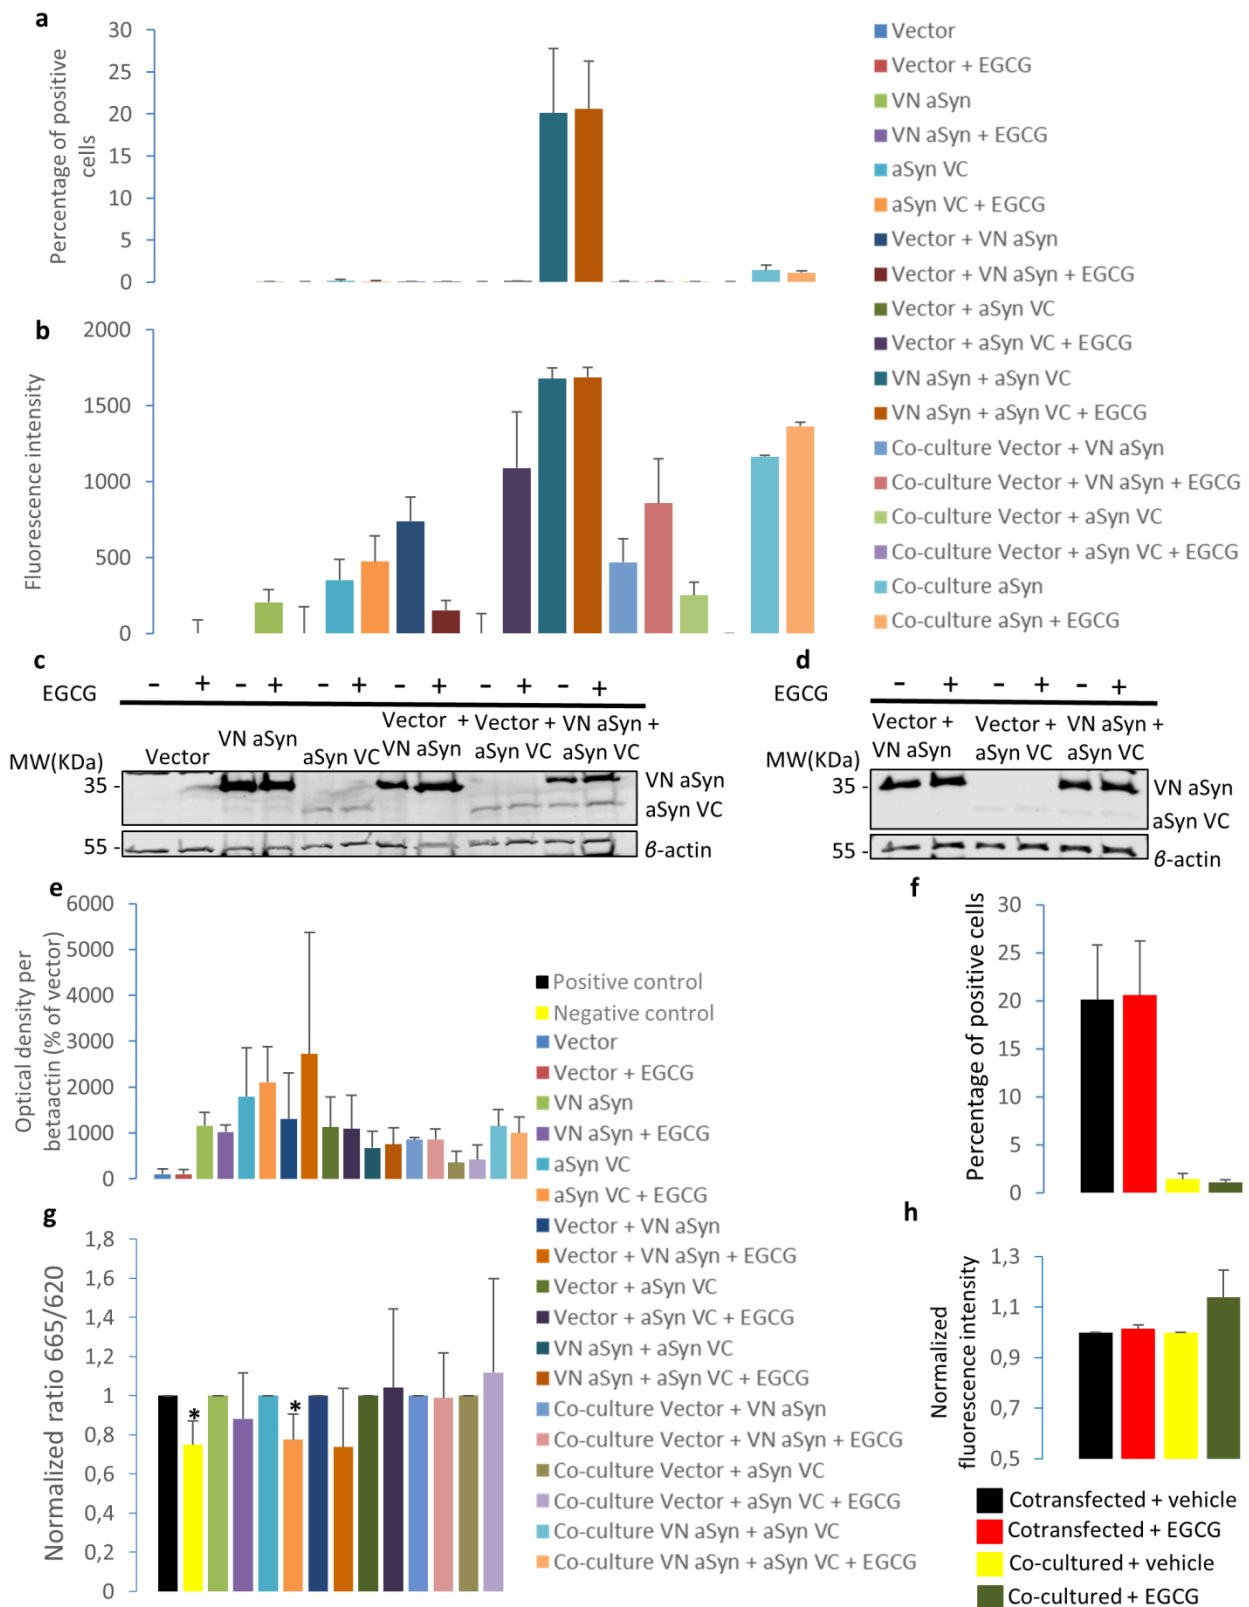

**Supplementary Fig. S4. Treatment with EGCG inhibits aSyn aggregation without altering protein expression.** **a.** Flow cytometry results showing the percentage of positive cells treated with EGCG. Treatment with EGCG does not lead to a significant decrease in



the percentage of positive cells. **b.** Flow cytometry levels of fluorescence intensity obtained in cells treated and untreated with EGCG. Treatment with EGCG does not lead to a significant decrease in fluorescence intensity. **c.** Western blot of transfected and non-co-cultured cells treated and non-treated with EGCG. Full length blots are presented in Supplementary Fig. S6r. **d.** Western blot of transfected and co-cultured cells treated with EGCG. Full length blots are presented in Supplementary Fig. S6s. **e.** Western blot quantification of the normalized optical density per beta-actin obtained in cells treated and untreated with EGCG showing no significant differences between treated and untreated cells (N=3). **f.** Flow cytometry results showing the percentage of positive cells in co-transfected cells and in co-cultured cells. **g.** HTRF measurements of the normalized ratio 665/620 in cells treated and untreated with EGCG. The positive control shows a significantly higher value than the negative control (N=4). **h.** Flow cytometry results for the normalized fluorescence intensity show no statistically significant differences (N=3). \*  $p < 0.05$  in comparison with the control. Error bars represent SD.

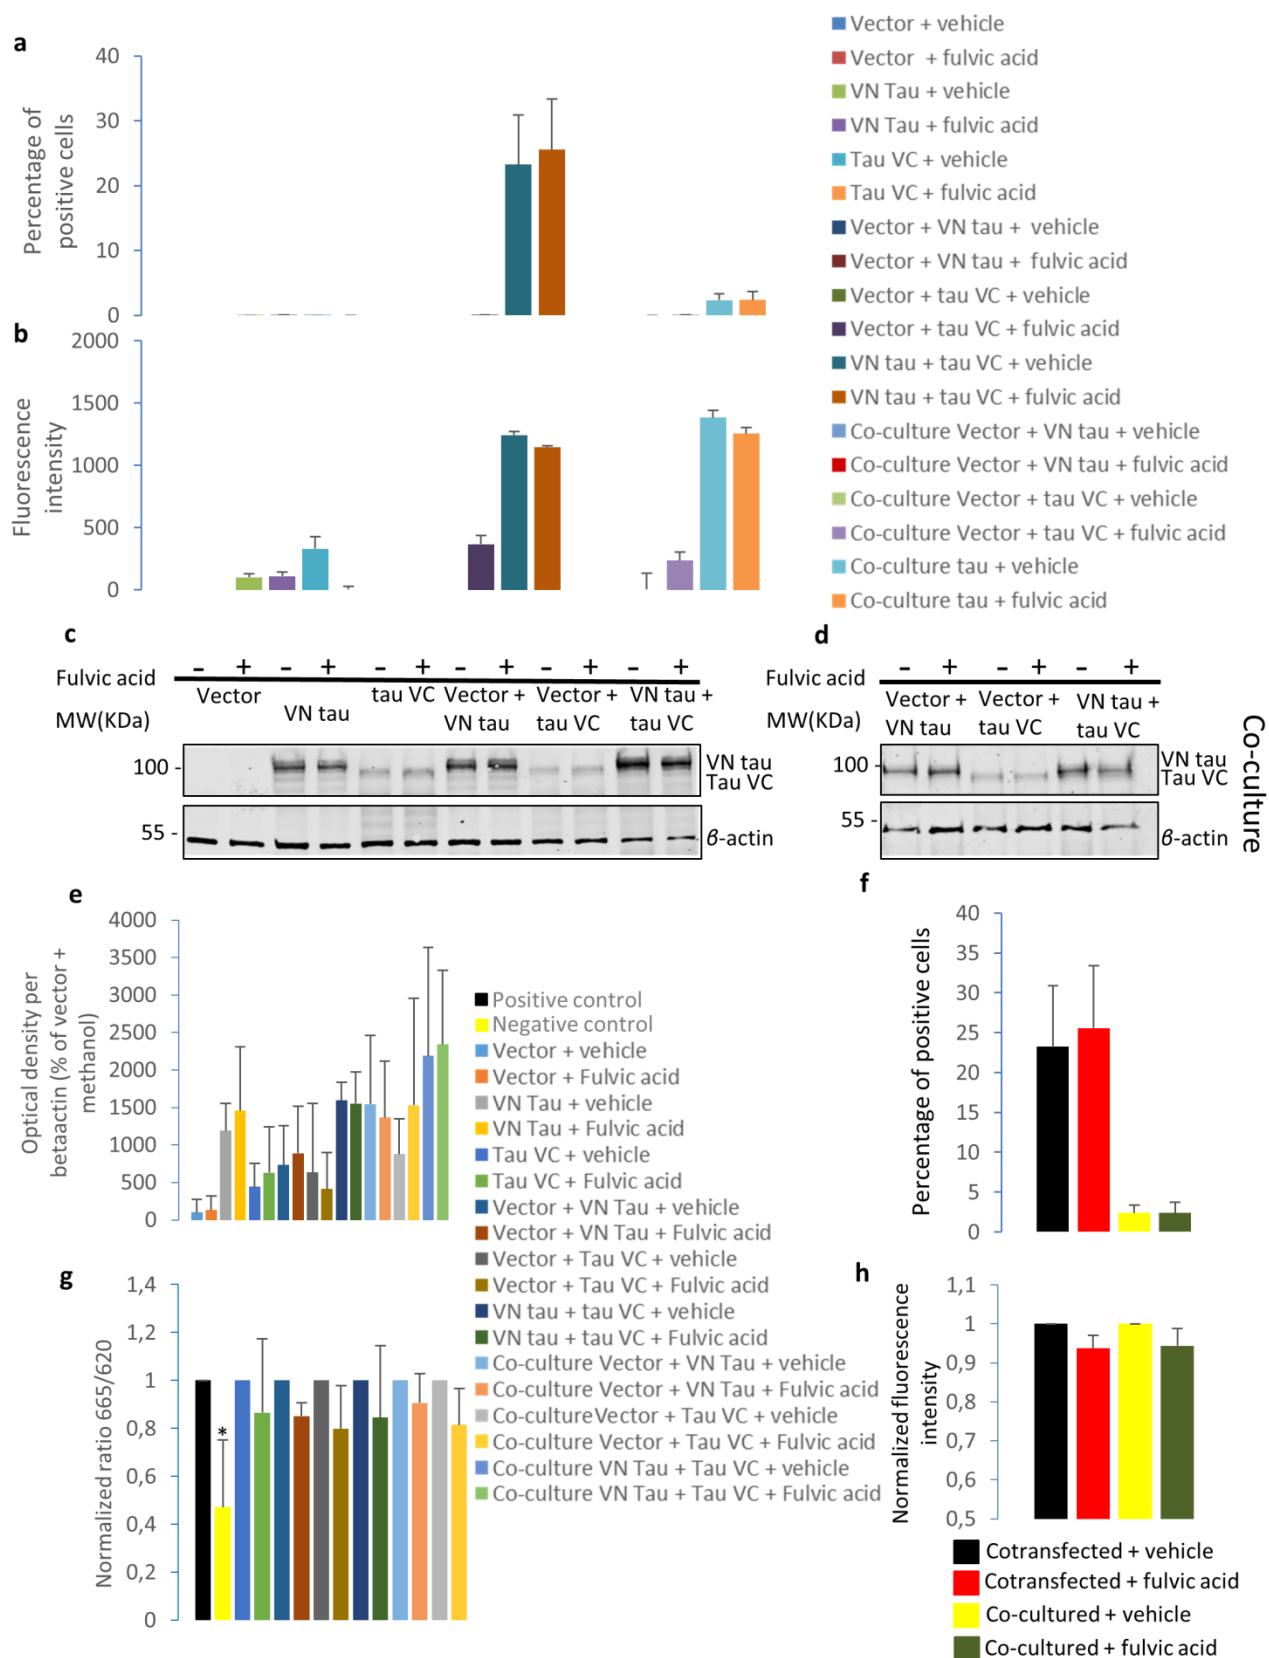

**Supplementary Fig. S5. Treatment with fulvic acid inhibits tau aggregation without altering protein levels.** **a.** Flow cytometry results showing the percentage of positive cells when treated with vehicle and fulvic acid. Treatment with fulvic acid does not lead to a

significant decrease in the percentage of positive cells. **b.** Flow cytometry levels of fluorescence intensity levels obtained in cells treated with vehicle and fulvic acid. **c.** Western blot analysis of transfected and non-co-cultured cells treated and non-treated with fulvic acid. Full length blots are presented in Supplementary Fig. S6p. **d.** Western blot of transfected and co-cultured cells treated with fulvic acid. Full length blots are presented in Supplementary Fig. S6q. **e.** Western blot quantification of the normalized optical density per beta-actin obtained in cells treated with vehicle and fulvic acid showing no significant differences between cells treated with vehicle or with fulvic acid (N=3). **f.** Flow cytometry results showing the percentage of positive cells in co-transfected cells and in co-cultured cells. **g.** HTRF values obtained for the normalized ratio 665/620 in cells treated with vehicle and fulvic acid. Positive control shows a significantly higher value than negative control (N=4). **h.** Flow cytometry results for the normalized fluorescence intensity show no statistically significant differences (N=3)\*  $p < 0.05$  in comparison with the control. \$  $p < 0.05$  in comparison with monomeric tau K18 + vehicle. Error bars represent SD.

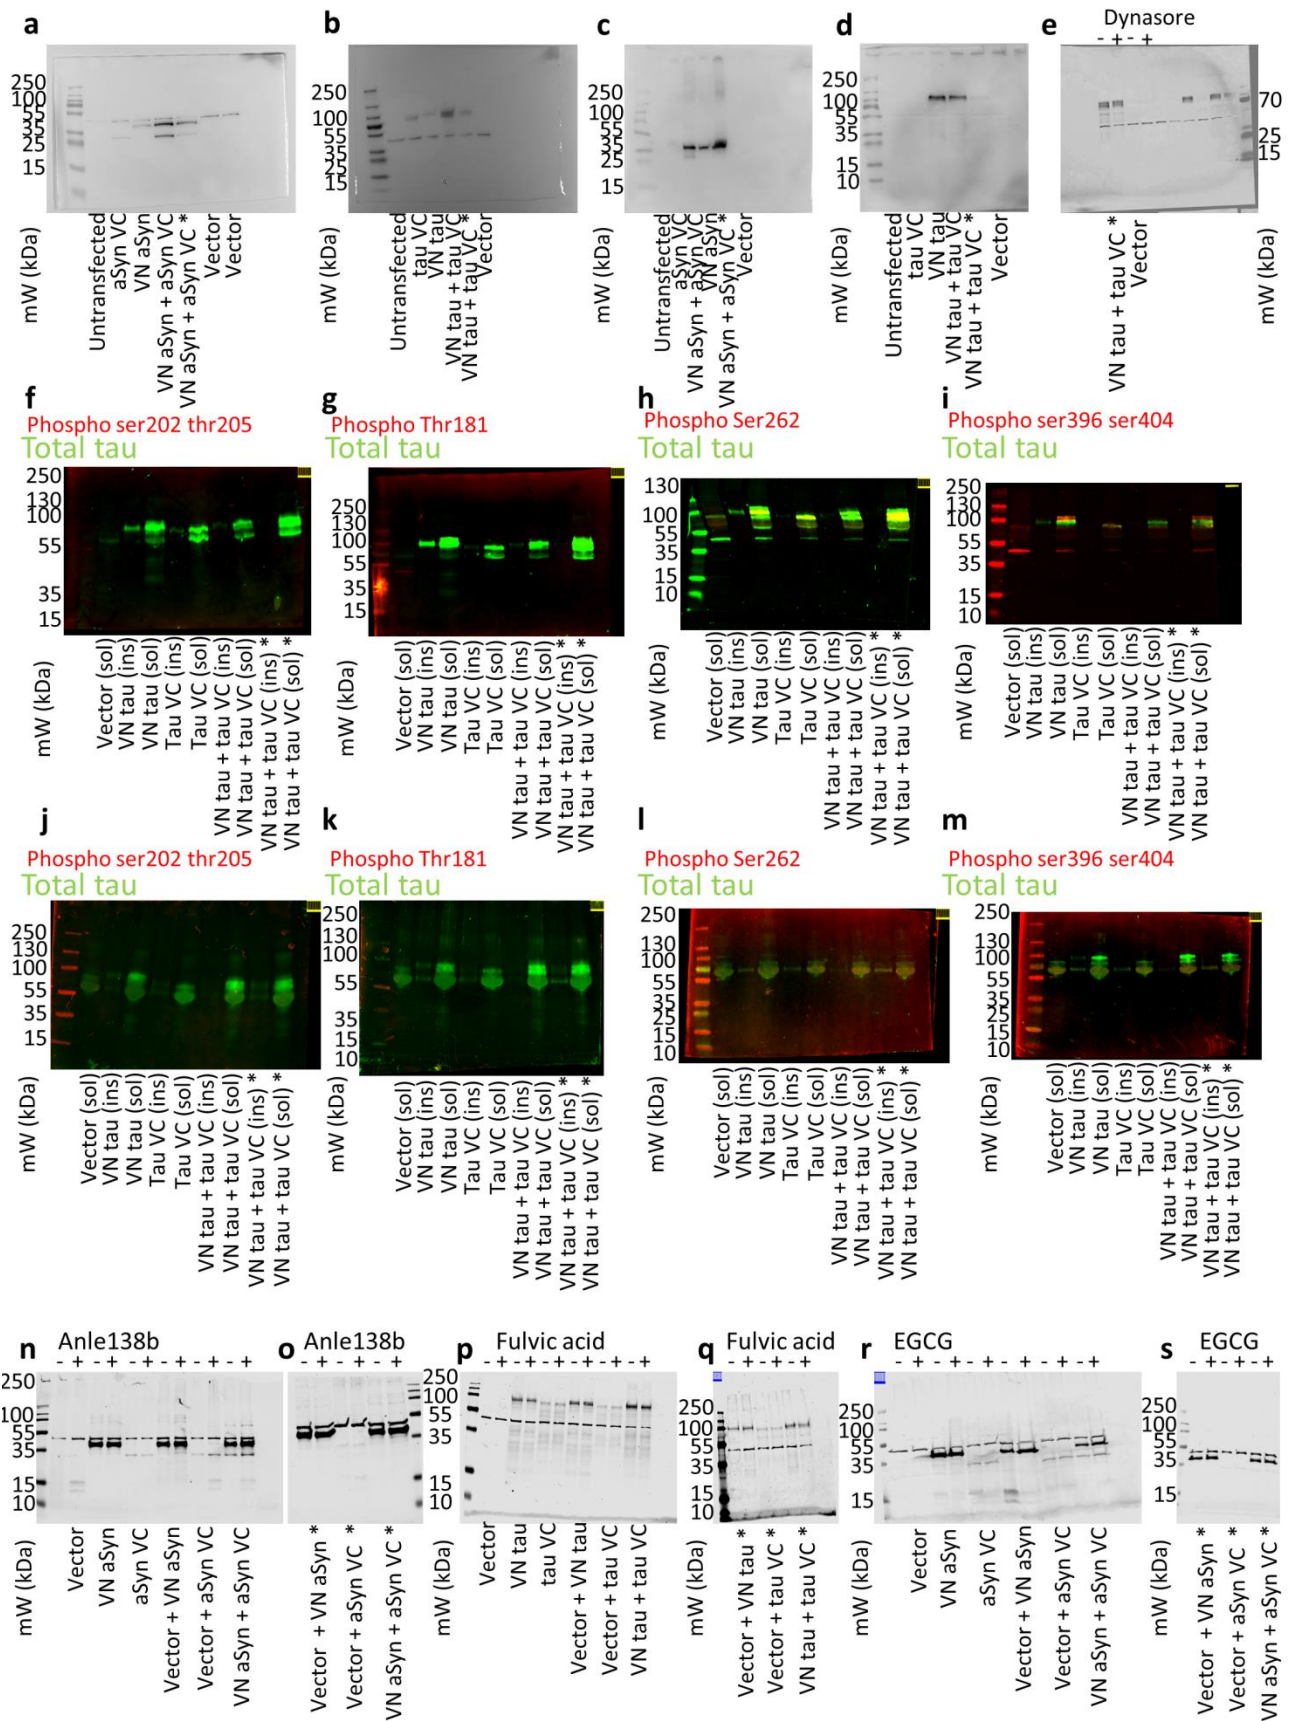

**Supplementary Fig. S6. Full length blots.** **a.** Full length blots of the cropped image from Fig. 1e. **b.** Full length blots of the cropped image from Fig. 1f. **c.** Full length blots of the cropped image from Fig. 2a. **d.** Full length blots of the cropped image from Fig. 2b. **e.** Full

length blots of the cropped image from Fig. 4h. Image is presented as an overlay of the full blot blot and the marker. **f-i**. Full length blots of the cropped images from Supplementary Fig. S2a. **j-m**. Full length blots of the cropped images from Supplementary Fig. S2b. **n**. Full length blots of the cropped images from Supplementary Fig.S3c. **o**. Full length blots of the cropped images from Supplementary Fig. S3d. **p**. Full length blots of the cropped images from Supplementary Fig. S4c. **q**. Full length blots of the cropped images from Supplementary Fig. S4d. **r**. Full length blots of the cropped images from Supplementary Fig. S5c. **s**. Full length blots of the cropped images from Supplementary Fig. S5d. Asterisks (\*) indicate co-cultured cells.

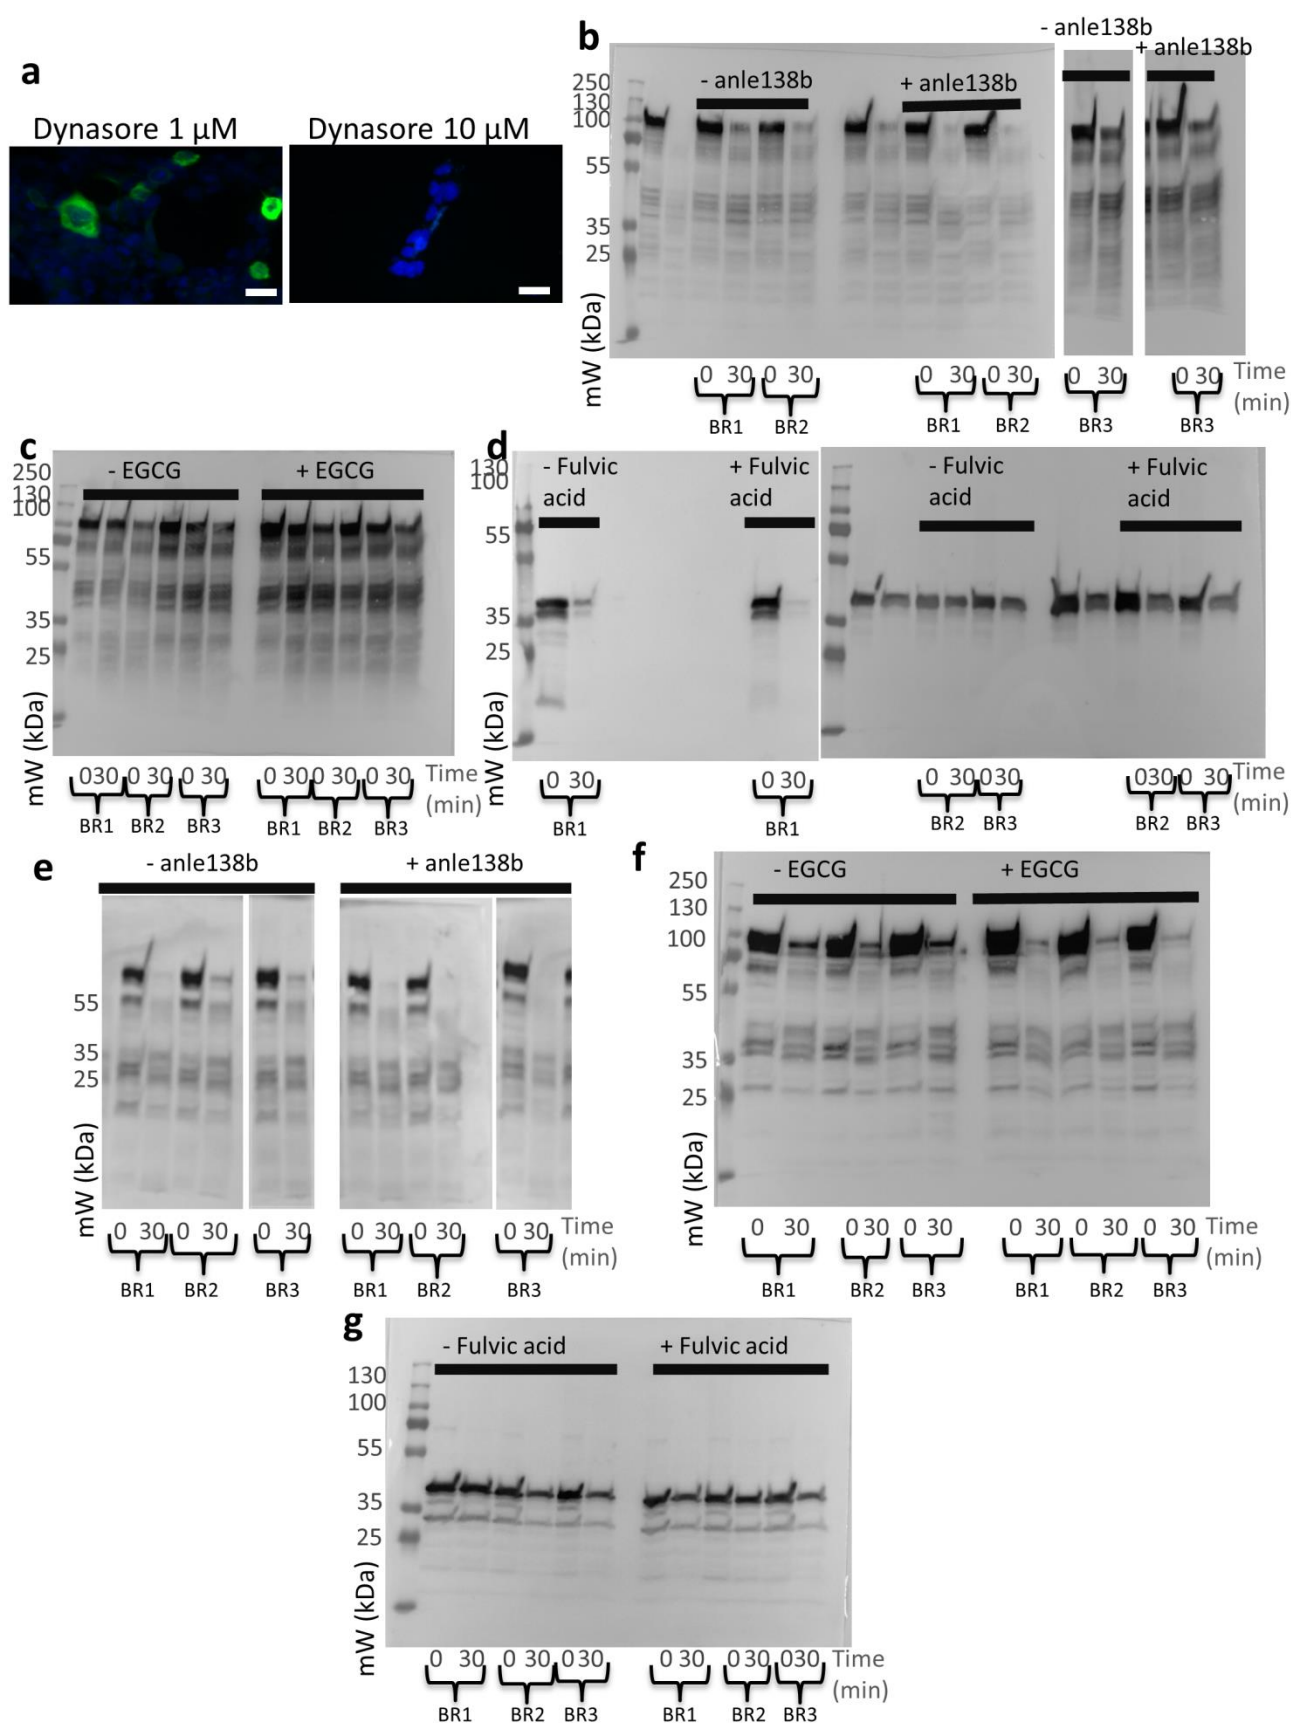

**Supplementary Fig. S7. a.** De visu assessment of dynasore activity at 1  $\mu$ M. There is an apparent higher number of fluorescent cells per field when cells are treated with 1  $\mu$ M in comparison with 10  $\mu$ M, pointing to dose-dependent effects. Scale bar: 23  $\mu$ m. **b.** Full

length blots of PK digestions from tau BiFC co-cultured cells treated with anle138b or vehicle. **c.** Full length blots of PK digestions from tau BiFC co-cultured cells treated with EGCG or vehicle. **d.** Full length blots of PK digestions from aSyn BiFC co-cultured cells treated with fulvic acid or vehicle. **e.** Full length blots of PK digestions from tau BiFC cells treated with anle138b or vehicle. **f.** Full length blots of PK digestions from tau BiFC cells treated with EGCG or vehicle. **g.** Full length blots of PK digestions from aSyn BiFC cells treated with fulvic acid or vehicle.
